# Supplementary material
Source: PubMed Central journal article supplement (PMC9397544)
Supplement: NIHMS1826207-supplement-1.pdf [file NIHMS1826207-supplement-1.pdf]

**A**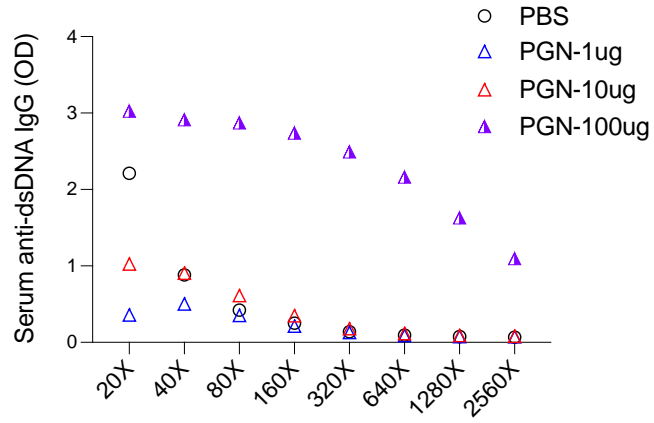**B**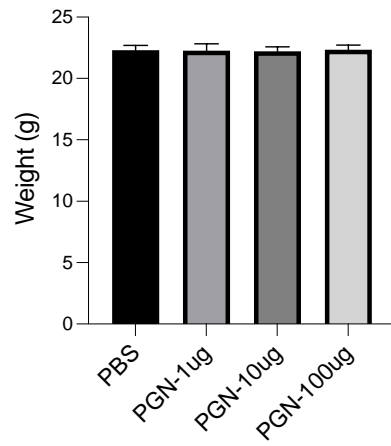

Supplementary Figure 1. Dose titration for production of anti-dsDNA IgG and TLR2 activation of PGNs.

**A**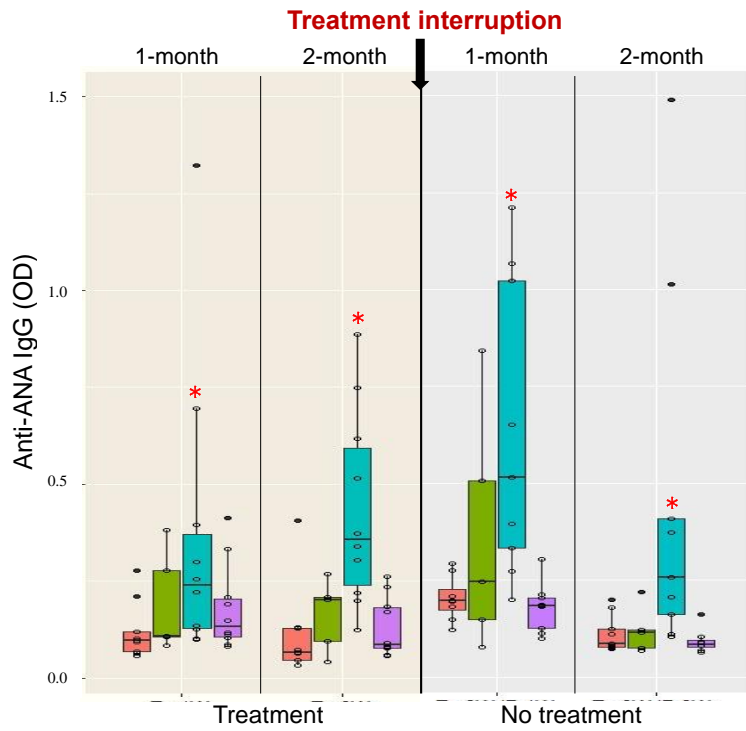**B**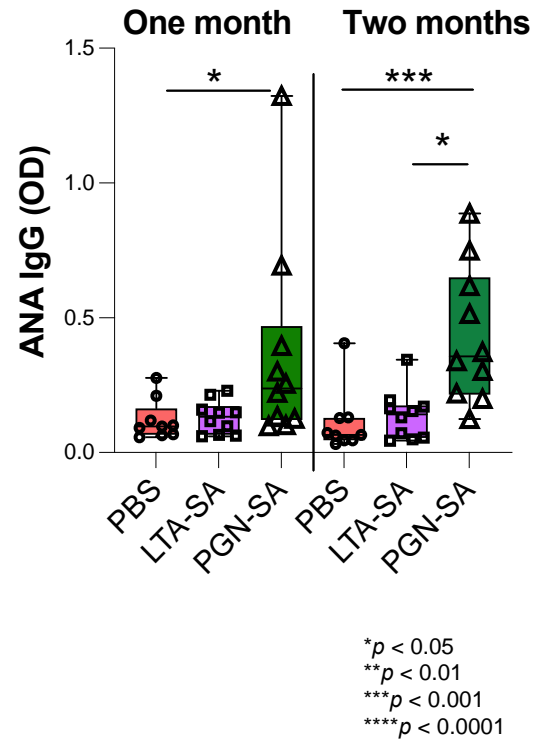**C**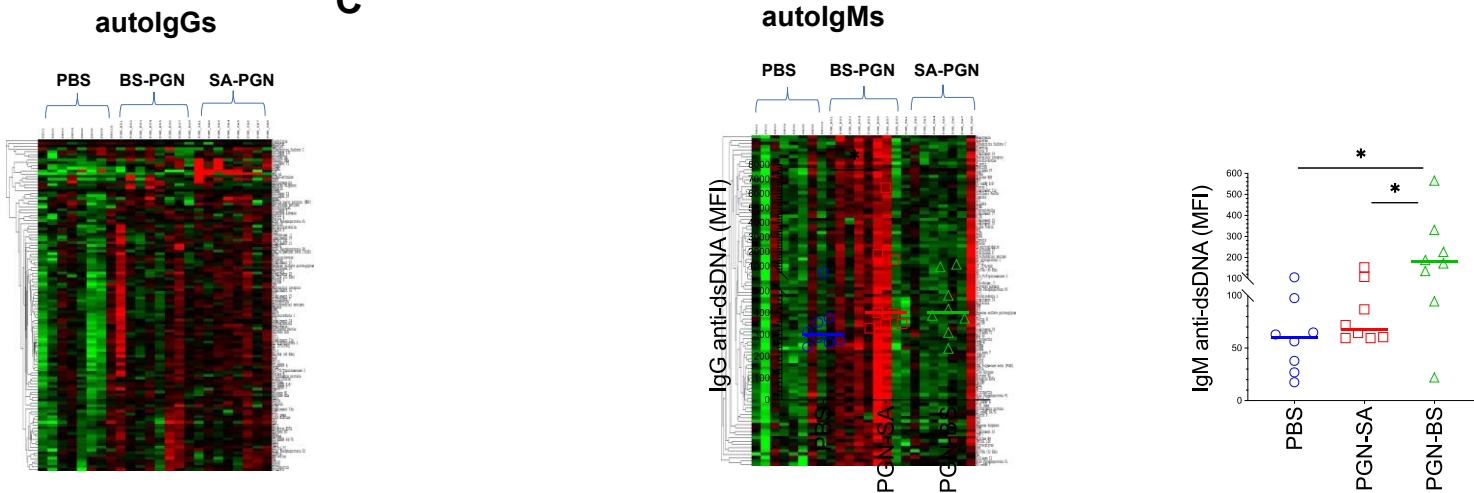

Supplementary Figure 2. *S. aureus* PGN but not *B. subtilis* PGN induced production of stable IgG ANA autoantibodies in C57/B6 mice.

**A**

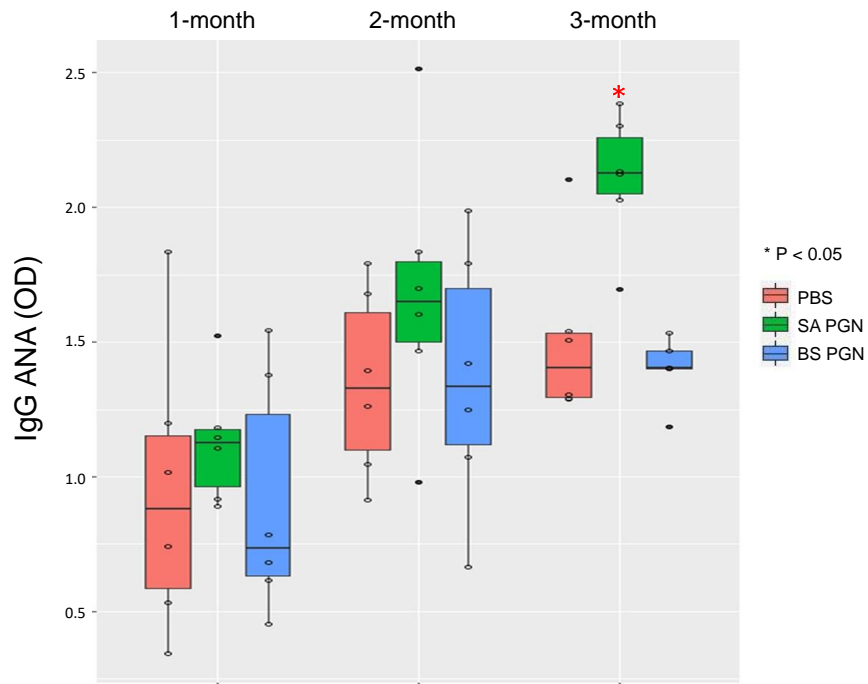

**B**

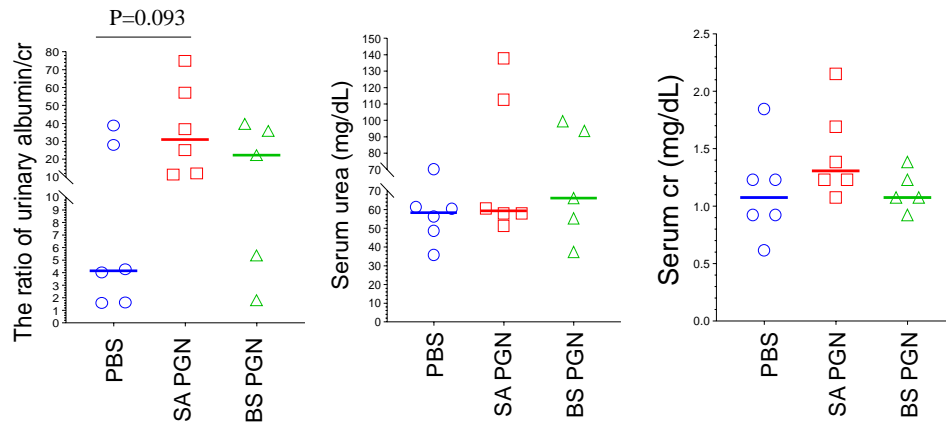

**Supplementary Figure 3. *S. aureus* PGN but not *B. subtilis* PGN induced production of IgG ANA in MRL/lpr mice.**

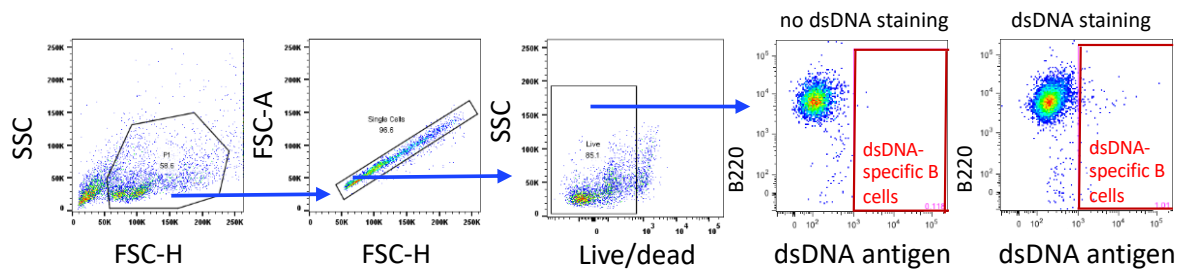

Supplementary Figure 4.

**Supplementary Table 1. Antibodies used in this study**

| <b>Antibody to</b>                 | <b>Type</b> | <b>Company</b> | <b>Cat.No.</b>   | <b>Assays</b> |
|------------------------------------|-------------|----------------|------------------|---------------|
| Mouse CD3, PerCP-Cy5.5-conjugated  | Rat mAb     | BD Biosciences | 560527(17A2)     | FCM           |
| Mouse CD4, BV510-conjugated        | Rat mAb     | BD Biosciences | 563106(RM4-5)    | FCM           |
| Mouse CD8a, APC-vio770 -conjugated | Rat mAb     | BD Biosciences | 557654(53-6.7)   | FCM           |
| Mouse CD19, BV421 -conjugated      | Rat mAb     | BD Biosciences | 562701(1D3)      | FCM           |
| Mouse F4/80, APC-conjugated        | Rat mAb     | BioLegend      | 123116(BM8 )     | FCM           |
| Mouse IgG, FITC-conjugated         | Goat pAb    | BioLegend      | 405305(Poly4053) | FCM           |
| Mouse B220, BV421-conjugated       | Rat mAb     | BioLegend      | 103239(RA3-6B2)  | FCM           |
| Mouse IgG2b, PE-conjugated         | Rat mAb     | BioLegend      | 406708(RMG2b-1)  | FCM           |

Abbreviations: mAb, monoclonal antibody; pAb, polyclonal antibody; FCM, flow cytometry.

|                                          | <b>Mean ± SD</b> |
|------------------------------------------|------------------|
| <b>Controls (n = 25)</b>                 |                  |
| <b>-Demographic features</b>             |                  |
| Male/female, n                           | 0/25             |
| African-American race                    | 13               |
| Mean age ± SD (years)                    | 35.7 ± 12.8      |
| <b>SLE patients (n = 32)</b>             |                  |
| <b>Mean ± SD</b>                         |                  |
| <b>-Demographic features</b>             |                  |
| Male/female, n                           | 0/32             |
| African-American race                    | 20               |
| Mean age ± SD (years)                    | 37.1 ± 9.1       |
| <b>-Clinical manifestations</b>          |                  |
| SLEDAI                                   | 2.94 ± 2.78      |
| <b>-Laboratory manifestations</b>        |                  |
| anti-dsDNA(IU/ml)                        | 26.0±30.9        |
| C3 complement (mg/dl)                    | 110.6±29.3       |
| C4 complement (mg/dl)                    | 25.5±10.9        |
| Serum albumin(g/dl)                      | 3.6±0.4          |
| BUN (mg/dl)                              | 16.0±10.2        |
| Serum creatinine (mg/dl)                 | 1.8±2.1          |
| Urine protein(mg/dl)                     | 70.8±131.1       |
| Urine creatinine (mg/dl)                 | 127.8±71.6       |
| Urine protein / creatinine ratio (mg/mg) | 477.8±910.3      |

**Supplementary Table 2. Demographic, clinical, and laboratory characteristics.**



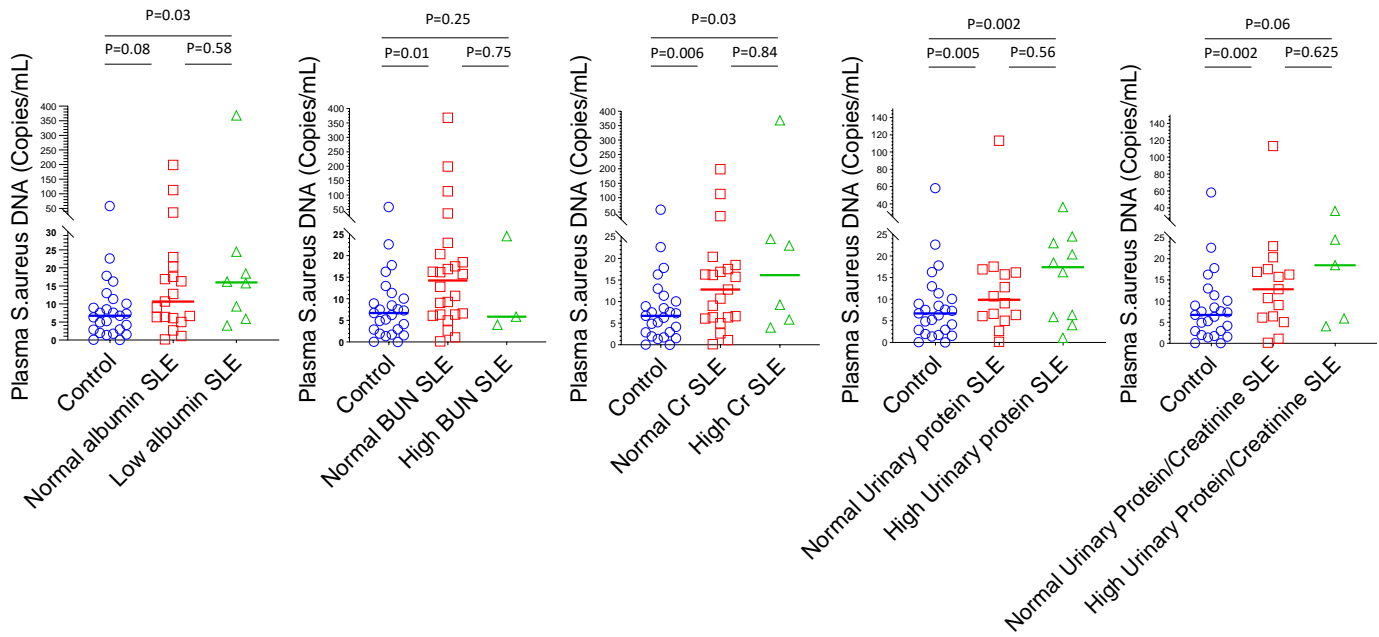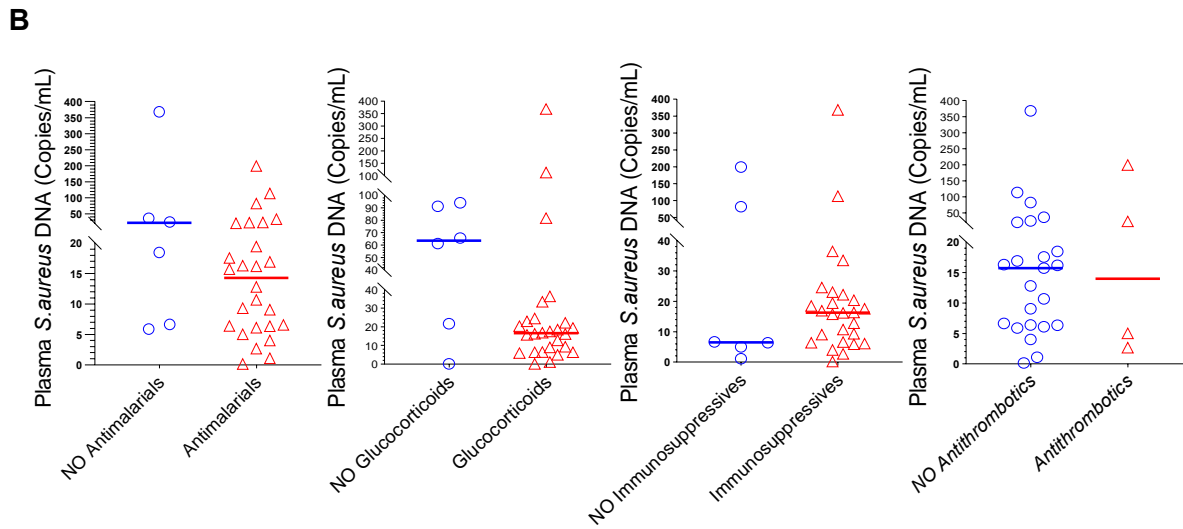

Supplementary Figure 5. Translocation of *S. aureus* DNA based on markers of kidney damage and treatment regimens.



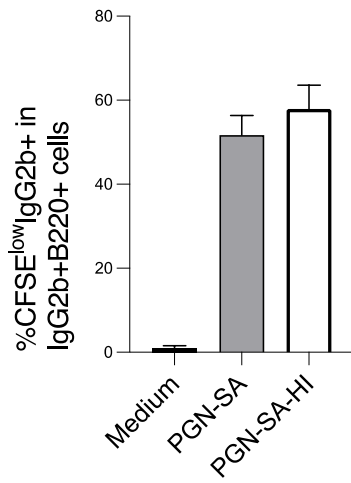

**Supplementary Figure 6. Comparison of IgG2b CSR induction in response to *S. aureus* PGN and heat inactivated *S. aureus* PGN.**
